# Supplementary material
Source: Springer Nature journal article supplement (https://www.springerprofessional.de/resource/supplementary/40095_2011_8_MOESM16_ESM.pdf/11899688)

Line line voltage

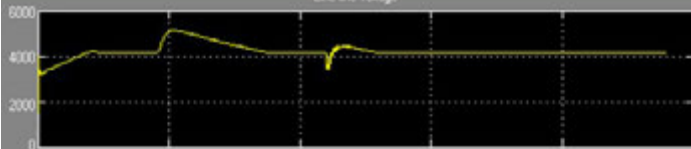

Load current

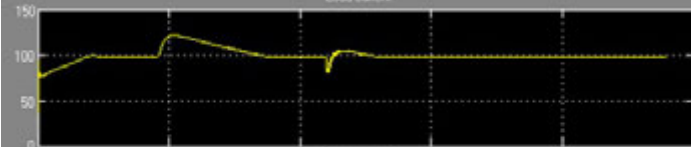

Frequency (Hz)

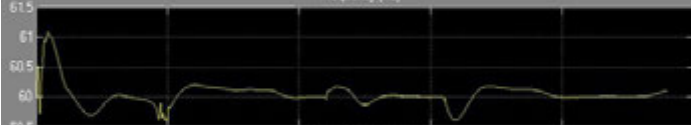

Diesel Speed (rpm)

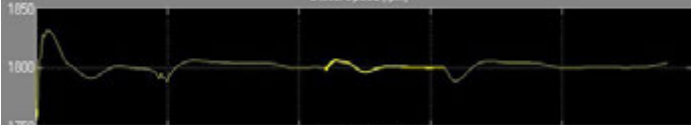

Wind Speed (m/s)

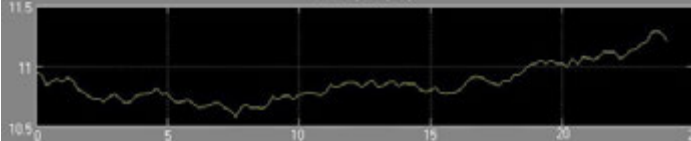

Supplement: MOESM16 [file 11899688]
